Published by

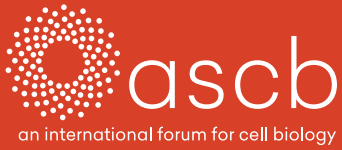

Editorial Partner

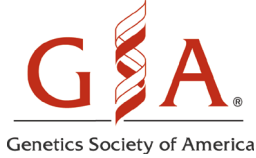

Volume 13, Winter 2014

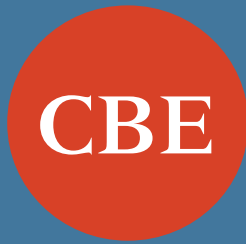

# Life Sciences Education

[www.lifescied.org](http://www.lifescied.org)

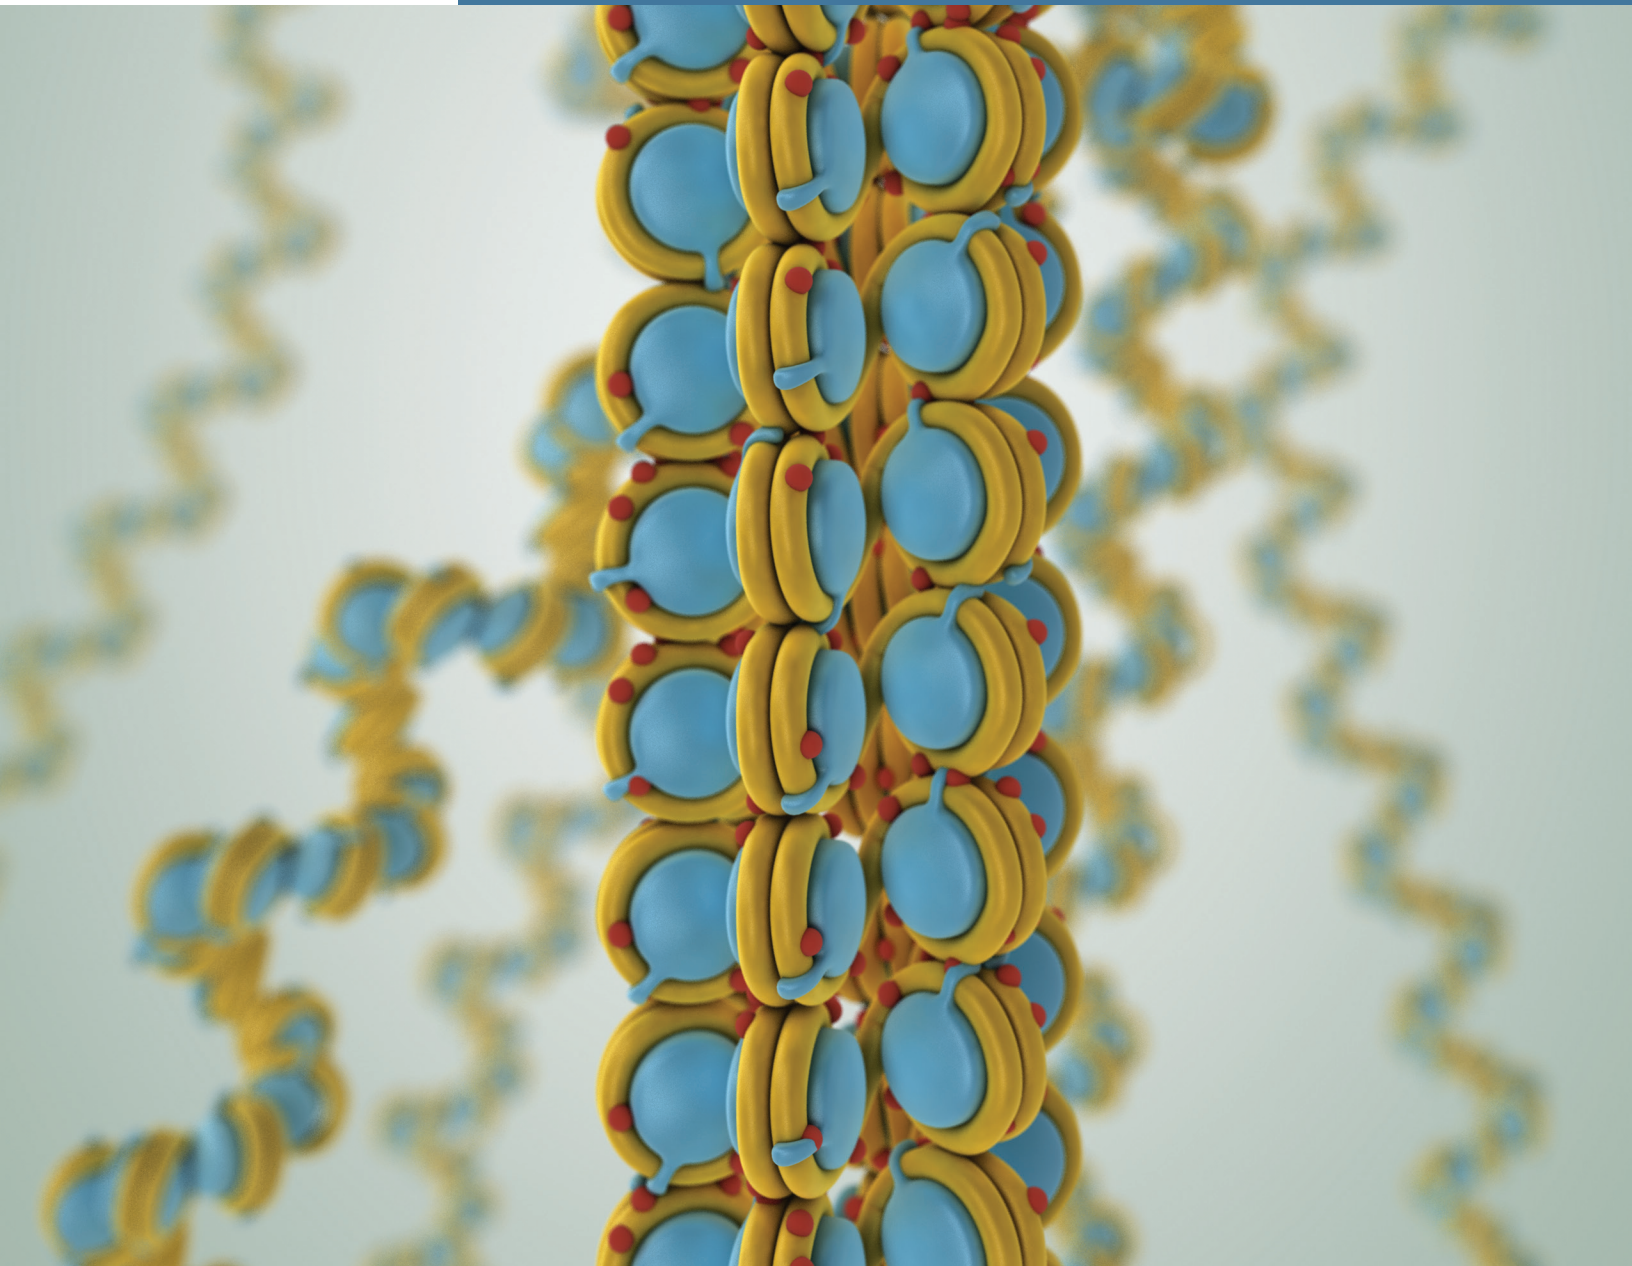

## Making Good Teaching More Visible
